# Supplementary material for: Limnospira indica PCC 8005 or Lacticaseibacillus rhamnosus GG Dietary Supplementation Modulate the Gut Microbiome in Mice
Source: MDPI journal article supplement (doi:10.3390/applmicrobiol2030049), 2022-08-31
Supplement: s1 [file s1]

Archive with 1 entries (1 files):
- applmicrobiol-1826014-supplementary.pdf
