# Supplementary material for: Limnospira indica PCC 8005 or Lacticaseibacillus rhamnosus GG Dietary Supplementation Modulate the Gut Microbiome in Mice
Source: MDPI journal article supplement (doi:10.3390/applmicrobiol2030049), 2022-08-31
Supplement: s1 [file s1 › applmicrobiol-1826014-supplementary.pdf]

## Supplementary Figures

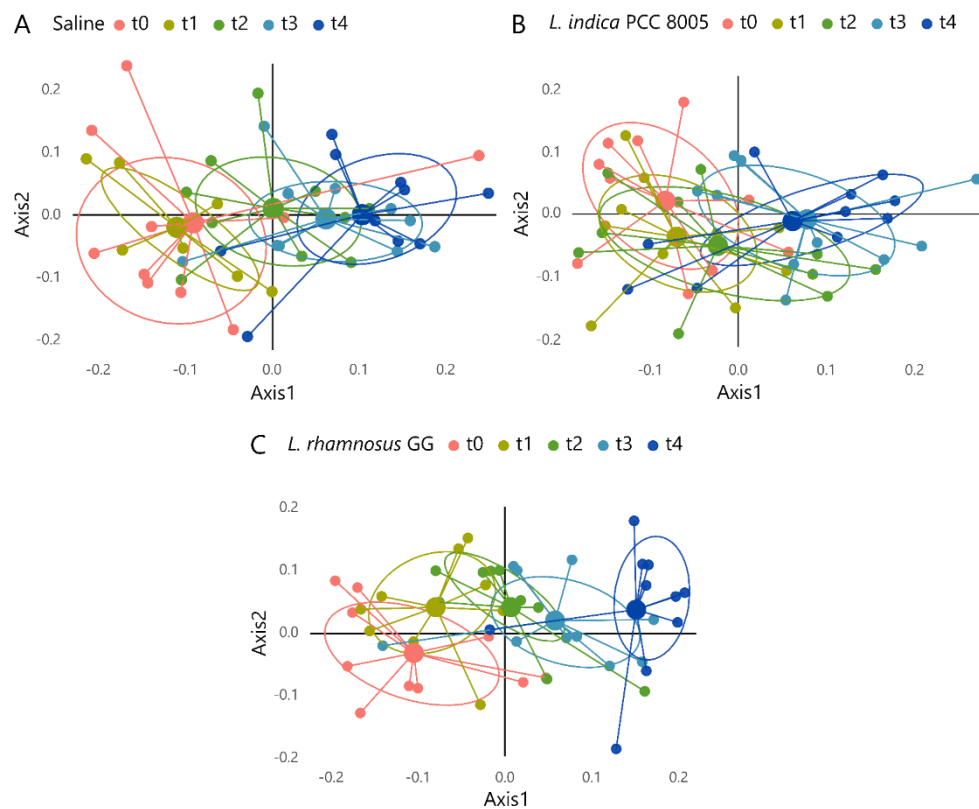

**Supplementary Figure S1.** Weighted UniFrac NMDS plots of (A) Saline, (B) *L. indica* PCC 8005 and (C) *L. rhamnosus* GG administered mice showing beta diversity with consideration of relative abundances,  $n=10$  per group.

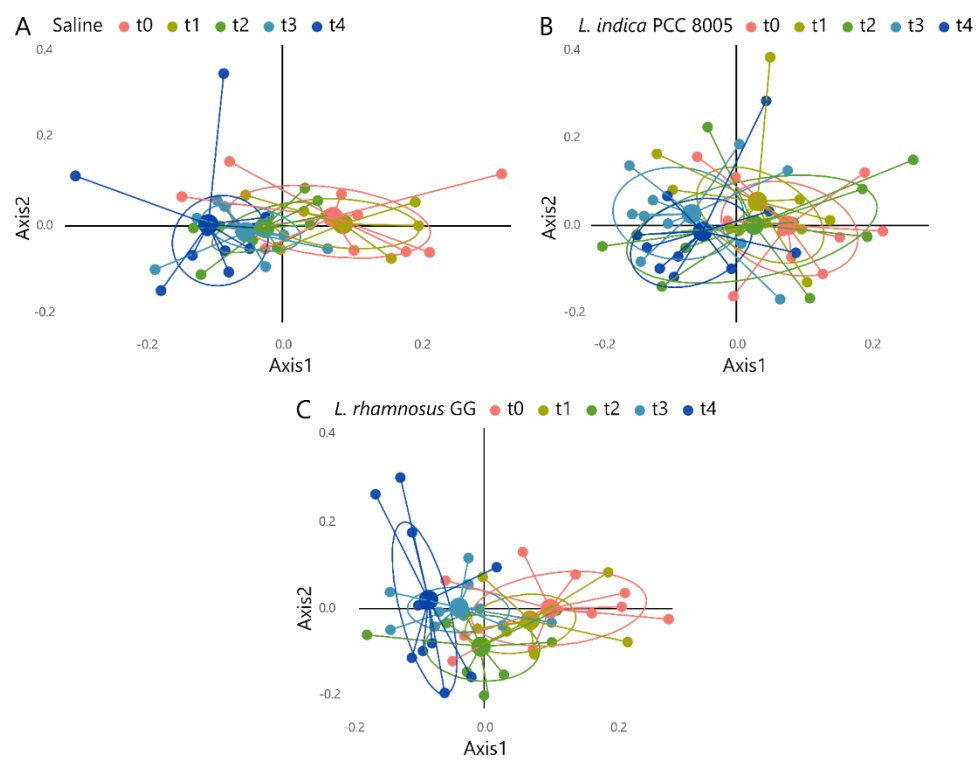

**Supplementary Figure S2.** Unweighted UniFrac NMDS plots of (A) Saline, (B) *L. indica* PCC 8005 and (C) *L. rhamnosus* GG administered mice showing beta diversity without consideration of relative abundances,  $n=10$  per group.

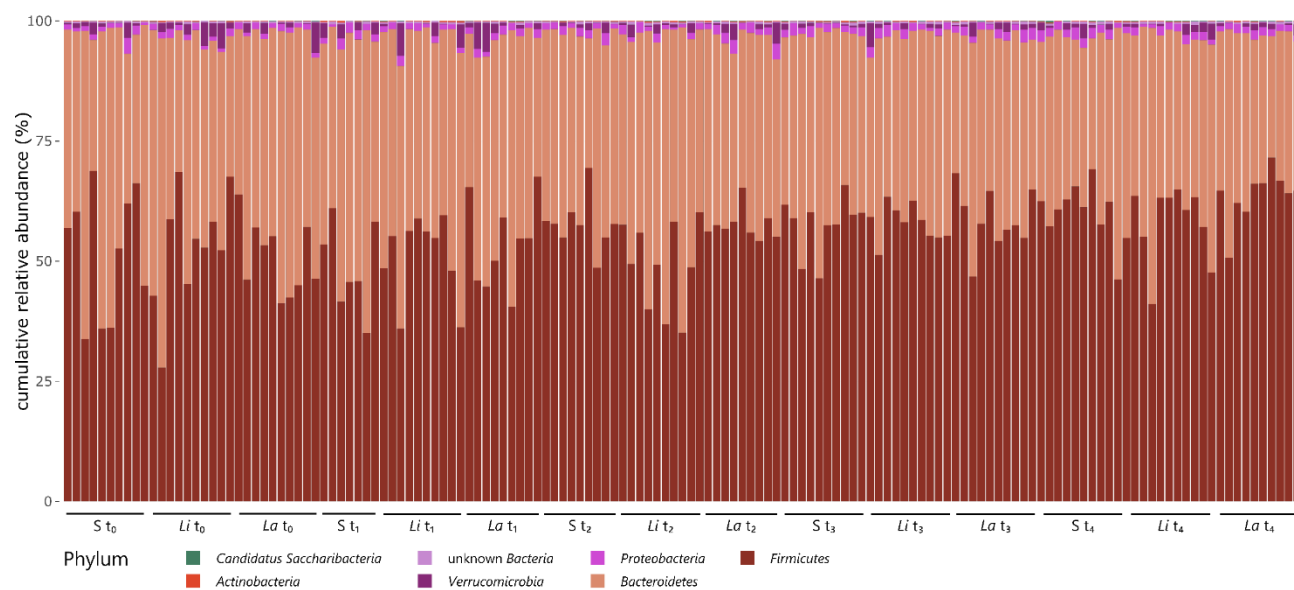

**Supplementary Figure S3.** Stacked bar plots representing the taxonomic profile evolution over the entire experimental course, at the level of phylum following supplementation with saline (S), *L. indica* PCC 8005 (Li) and *L. rhamnosus* GG (La),  $n=10$ .

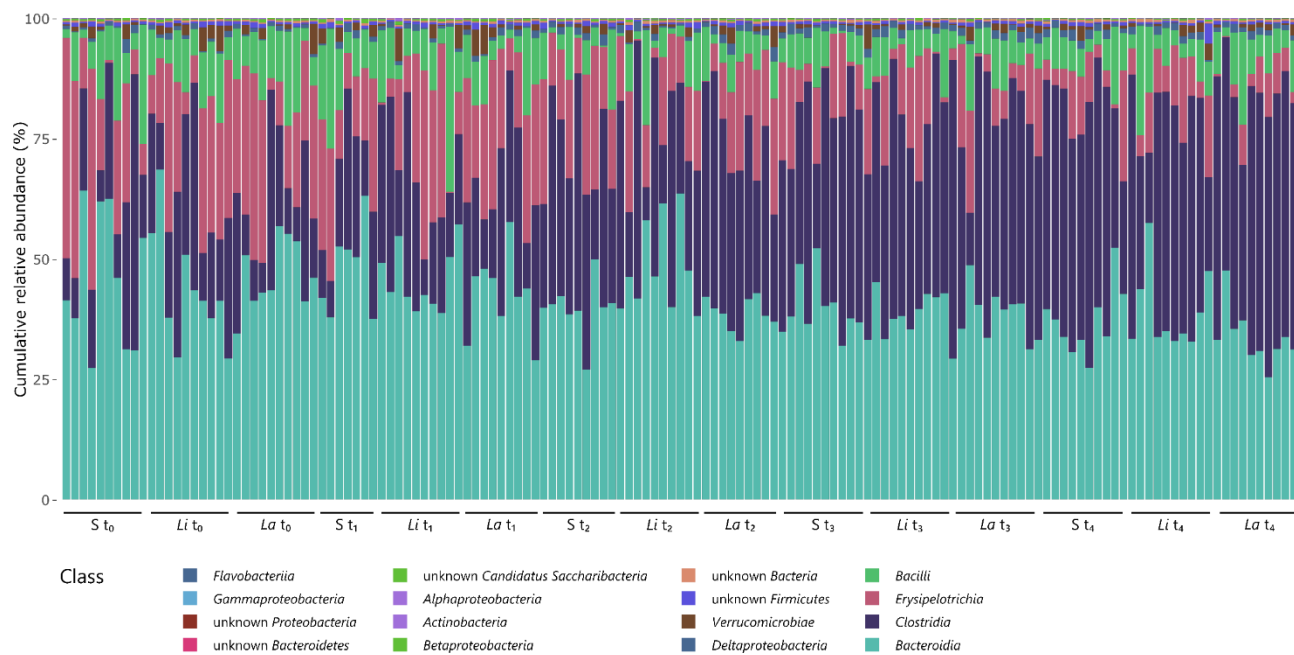

**Supplementary Figure S4.** Stacked bar plots representing the taxonomic profile evolution over the entire experimental course, at the level of class following supplementation with saline (S), *L. indica* PCC 8005 (Li) and *L. rhamnosus* GG (La),  $n=10$ .

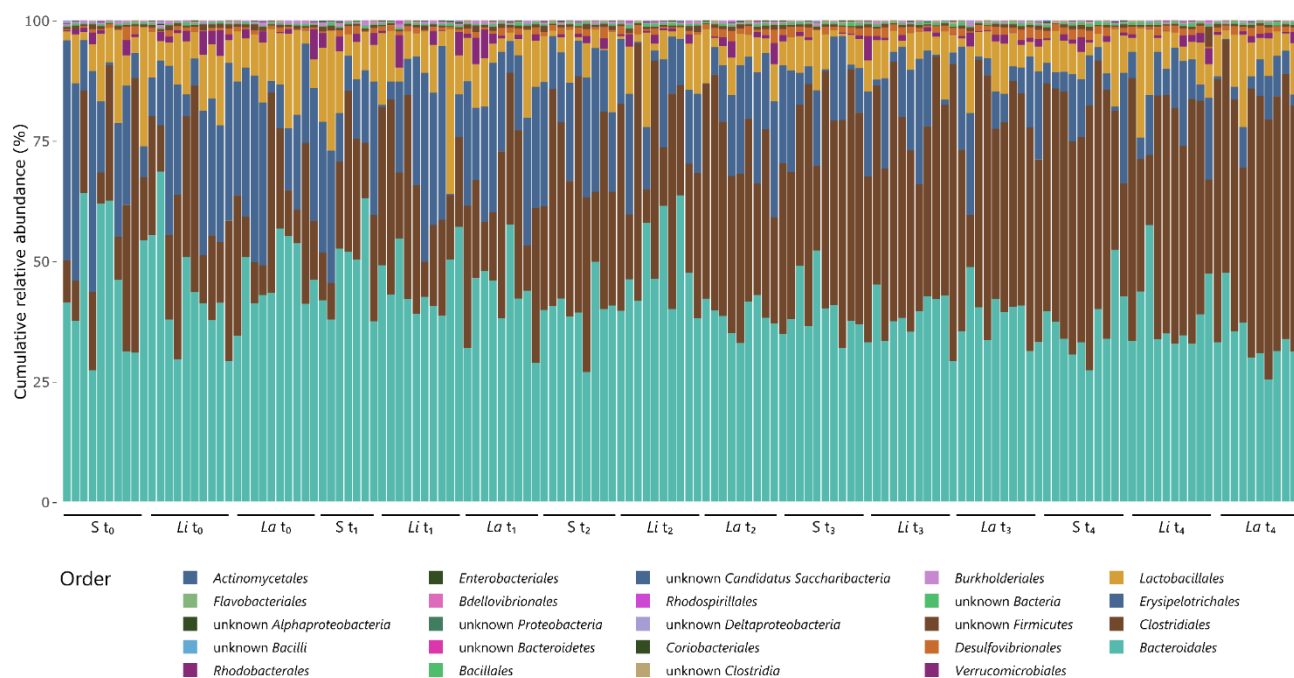

**Supplementary Figure S5.** Stacked bar plots representing the taxonomic profile evolution over the entire experimental course, at the level of order following supplementation with saline (S), *L. indica* PCC 8005 (Li) and *L. rhamnosus* GG (La),  $n=10$ .

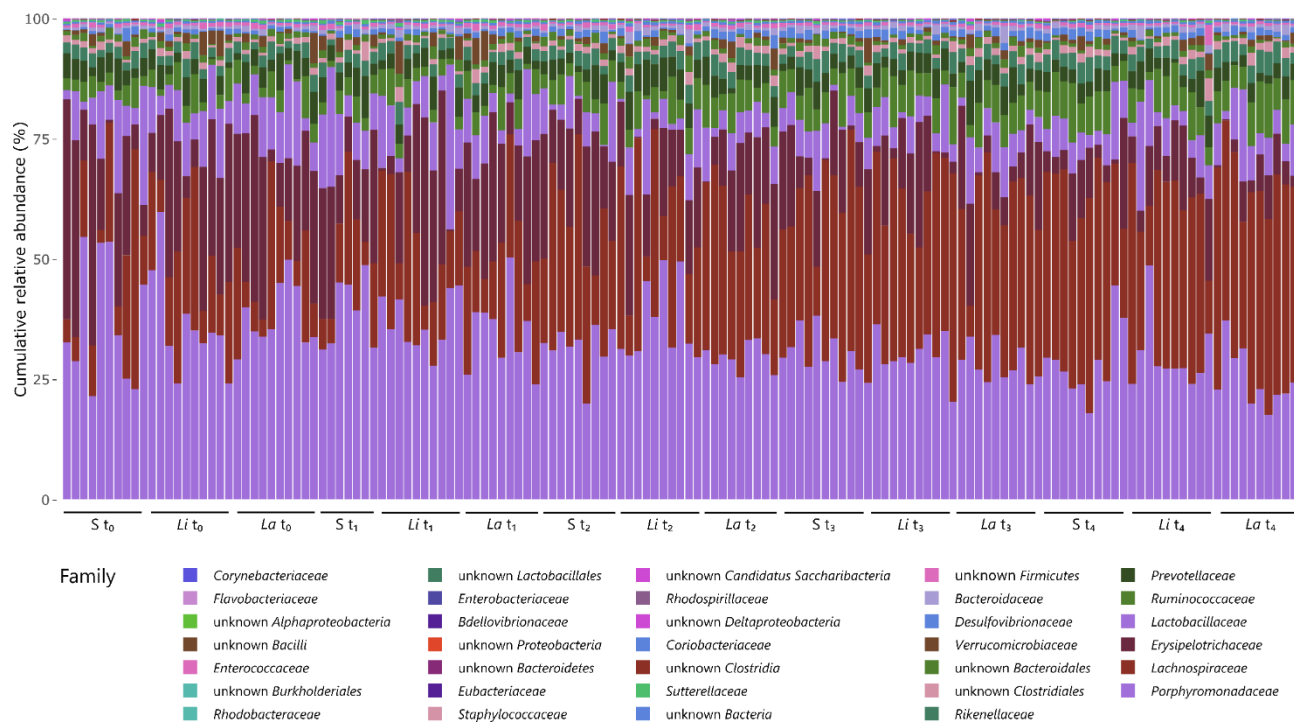

**Supplementary Figure S6.** Stacked bar plots representing the taxonomic profile evolution over the entire experimental course, at the level of family following supplementation with saline (S), *L. indica* PCC 8005 (Li) and *L. rhamnosus* GG (La),  $n=10$ .

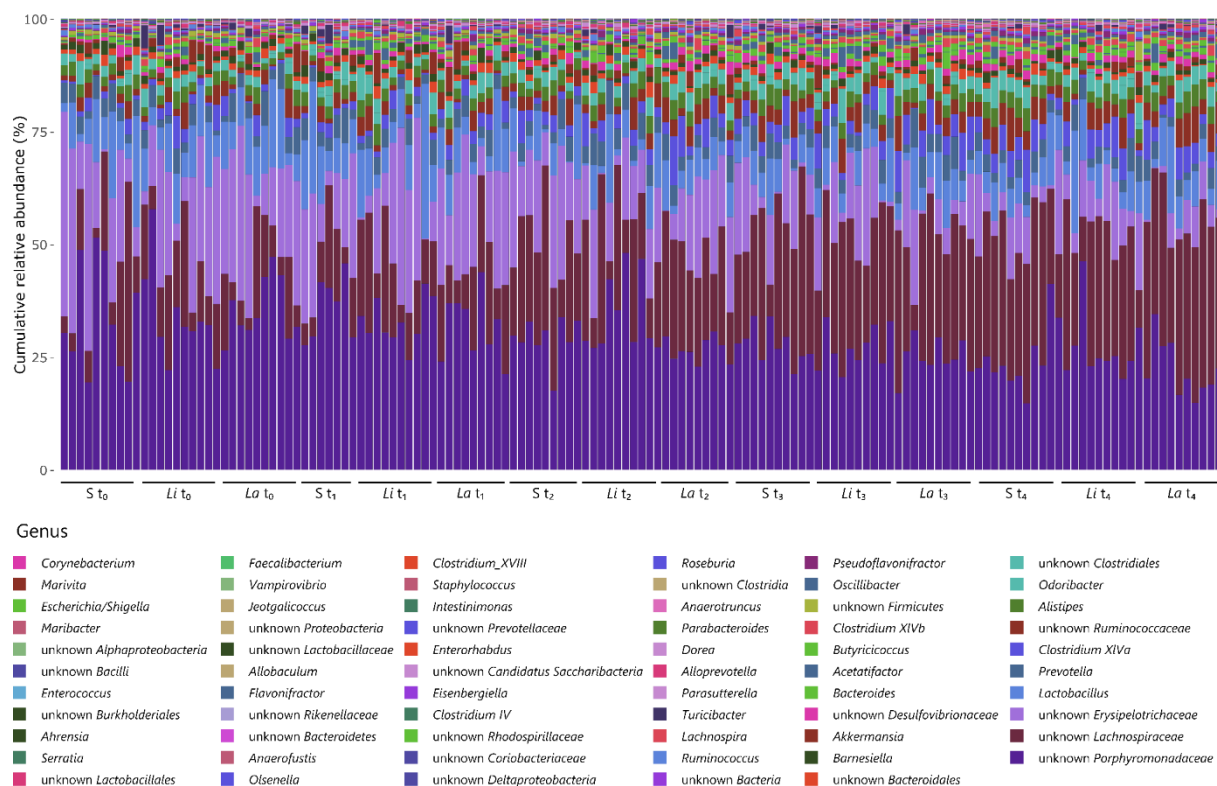

**Supplementary Figure S7.** Stacked bar plots representing the taxonomic profile evolution over the entire experimental course, at the level of genus following supplementation with saline (S), *L. indica* PCC 8005 (Li) and *L. rhamnosus* GG (La),  $n=10$ .
